# Supplementary material for: Fabrication of a novel few-layer WS2/Bi2MoO6 plate-on-plate heterojunction structure with enhanced visible-light photocatalytic activity
Source: Royal Society of Chemistry journal article supplement (doi:10.1039/c8dt02109k), 2018-01-01
Supplement: c8dt02109k1.pdf [file c8dt02109k1.pdf]

## Supplementary data

### Fabrication of novel few-layer WS<sub>2</sub>/Bi<sub>2</sub>MoO<sub>6</sub> plate-on-plate heterojunction structure with enhanced visible-light photocatalytic activity

Xiang Li\*, Mengyuan Su, Guifen Zhu, Kaige Zhang, Xia Zhang, Jing Fan\*

School of Environment, Henan Key Laboratory for Environmental Pollution Control,  
Key Laboratory for Yellow River and Huai River Water Environment and Pollution  
Control, Ministry of Education, Henan Normal University, Xinxiang, Henan 453007,  
P. R. China

\*Address correspondence at: School of Environment, Henan Normal University,  
Xinxiang, Henan 453007, P. R. China

Tel: +86-373-3325719

Fax: +86-373-3325719

E-mail: [xli2011@163.com](mailto:xli2011@163.com) (X. Li); [fanjing@htu.cn](mailto:fanjing@htu.cn) (J. Fan)

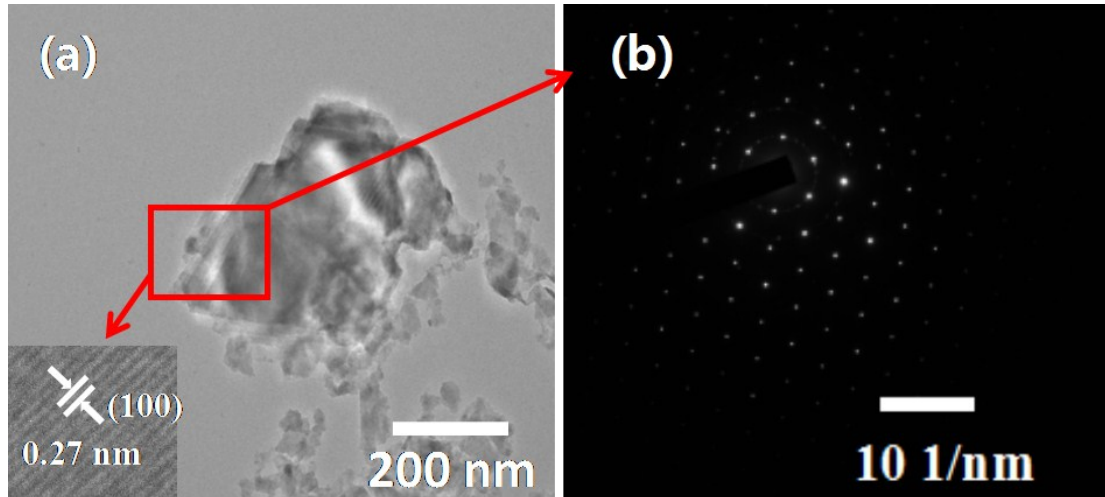

**Fig. S1** (a) TEM and (b) the selected area electron diffraction (SAED) pattern of a few layers of WS<sub>2</sub> nanosheets. Inset: HRTEM image of a few layers of WS<sub>2</sub> nanosheets.

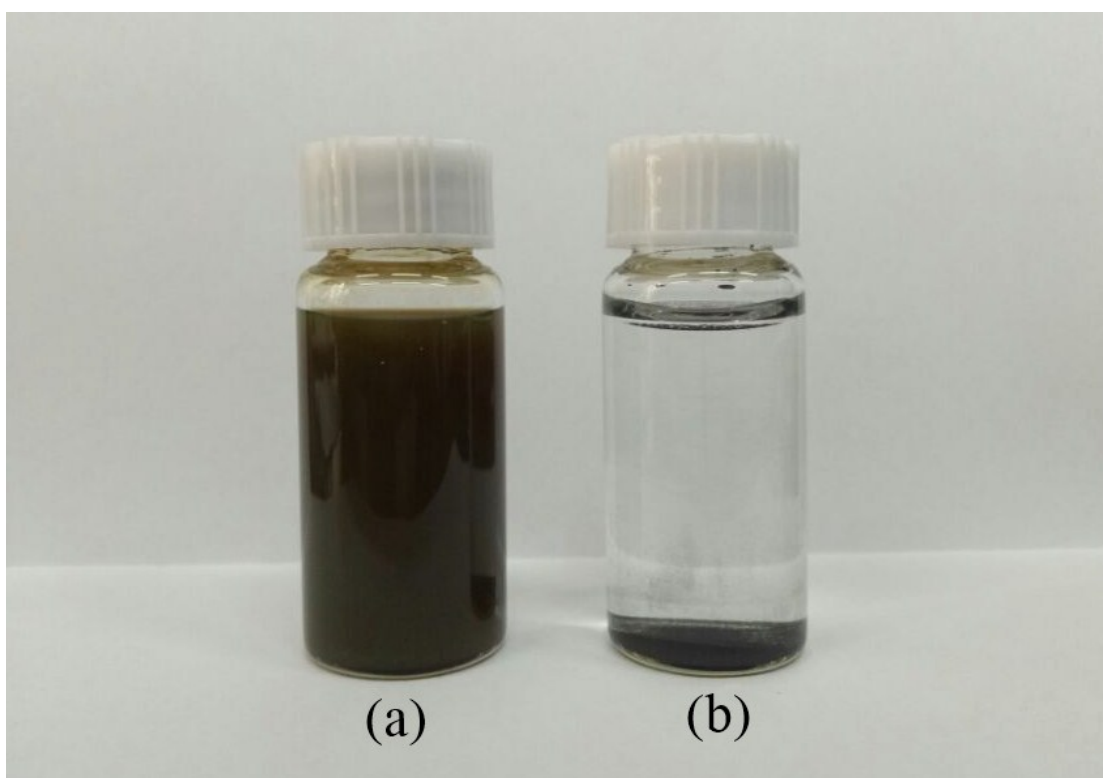

**Fig. S2** The photographs of a few layers of WS<sub>2</sub> nanosheets (a) and bulk WS<sub>2</sub> (b) in the ethanol/water mixtures with ethanol volume fractions of 35% after being stored for 20 days.

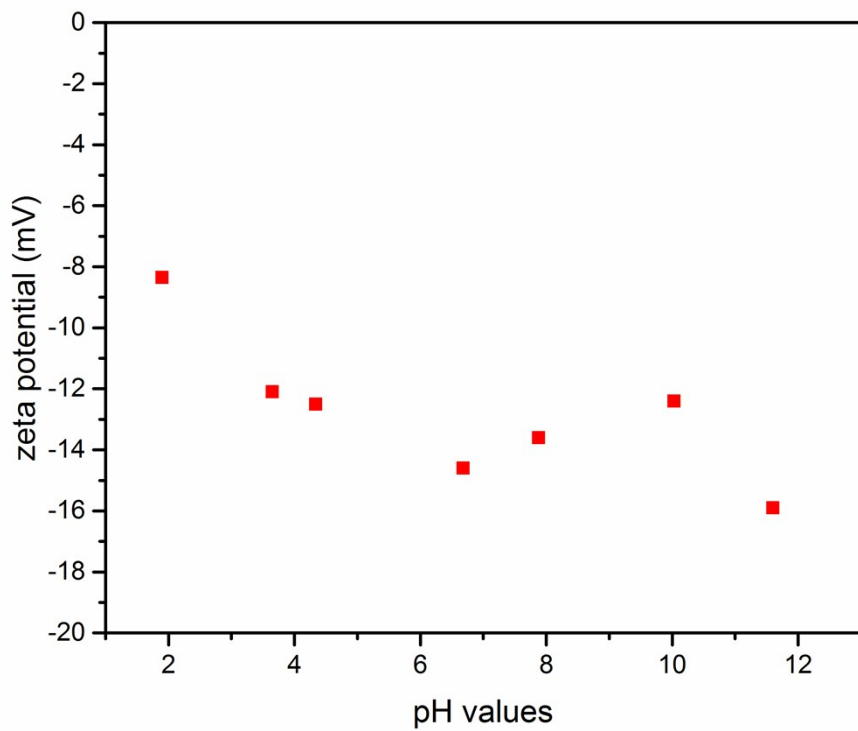

**Fig. S3** zeta potential of a few layers of WS<sub>2</sub> nanosheets measured in ethanol solution with adjusted pH range.

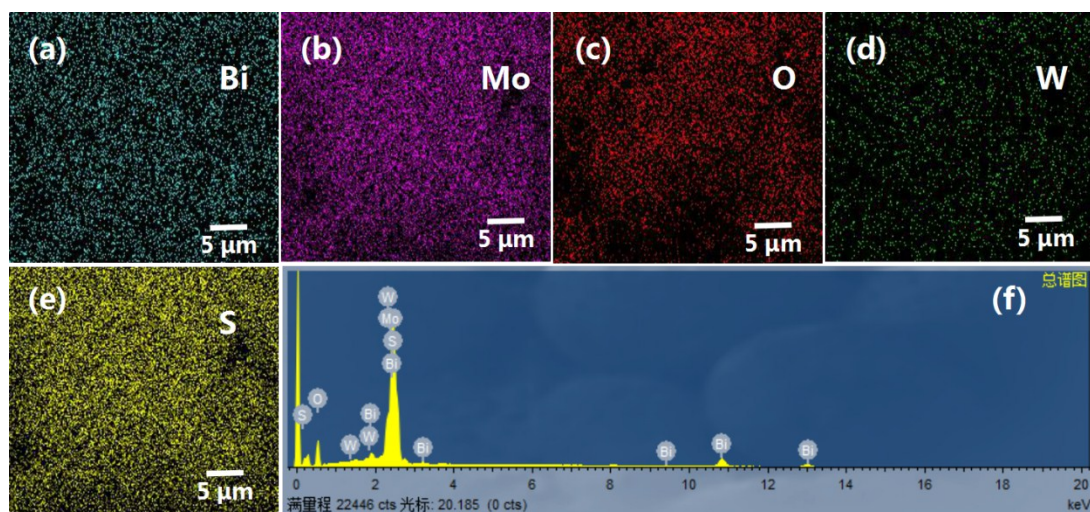

**Fig. S4** Energy dispersive X-ray spectroscopy (EDS) distribution maps of sample: (a-e) EDS elemental mapping and (f) EDS spectrum of the hierarchical  $\text{WS}_2/\text{Bi}_2\text{MoO}_6$  composite (5 wt% of  $\text{WS}_2$ ).

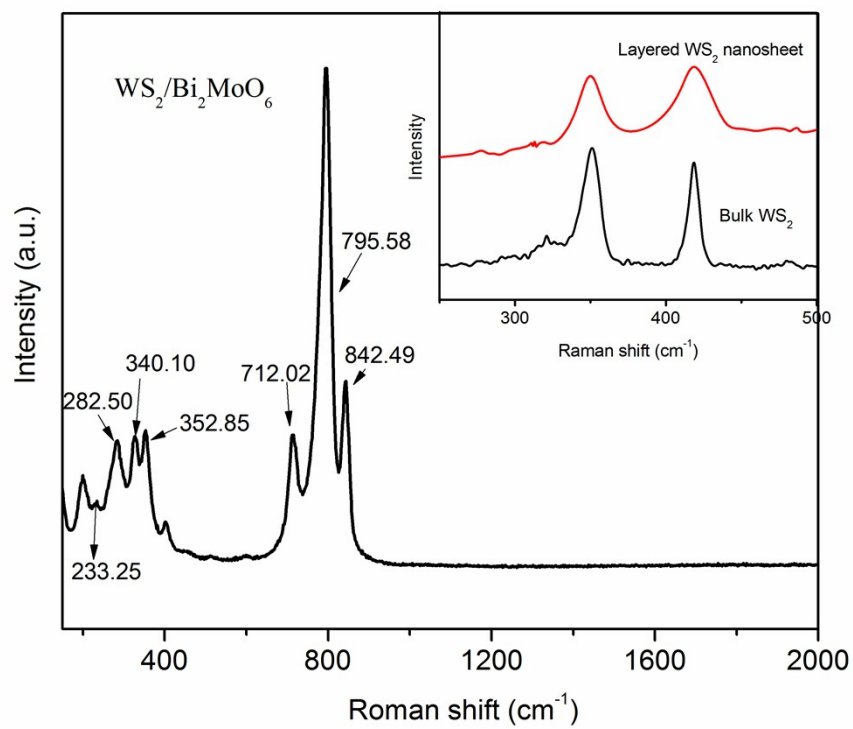

**Fig. S5** Raman spectrum of the hierarchical  $\text{WS}_2/\text{Bi}_2\text{MoO}_6$  composite (5 wt% of  $\text{WS}_2$ ).  
Inset: Raman spectra of the a few layers of  $\text{WS}_2$  nanosheets and bulk  $\text{WS}_2$ .

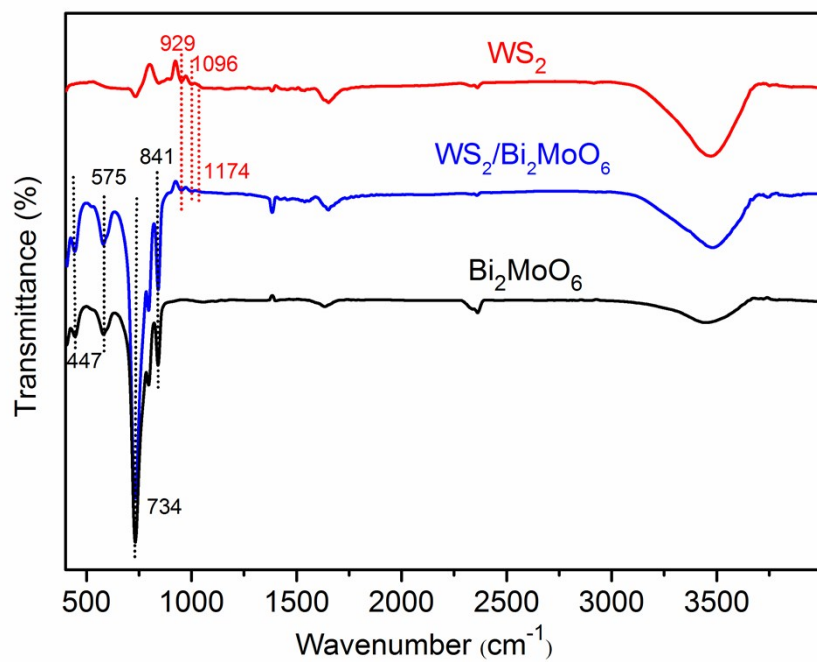

**Fig. S6** FT-IR spectra of the pure  $\text{Bi}_2\text{MoO}_6$ ,  $\text{WS}_2$  and the hierarchical  $\text{WS}_2/\text{Bi}_2\text{MoO}_6$  composite (5 wt% of  $\text{WS}_2$ ).

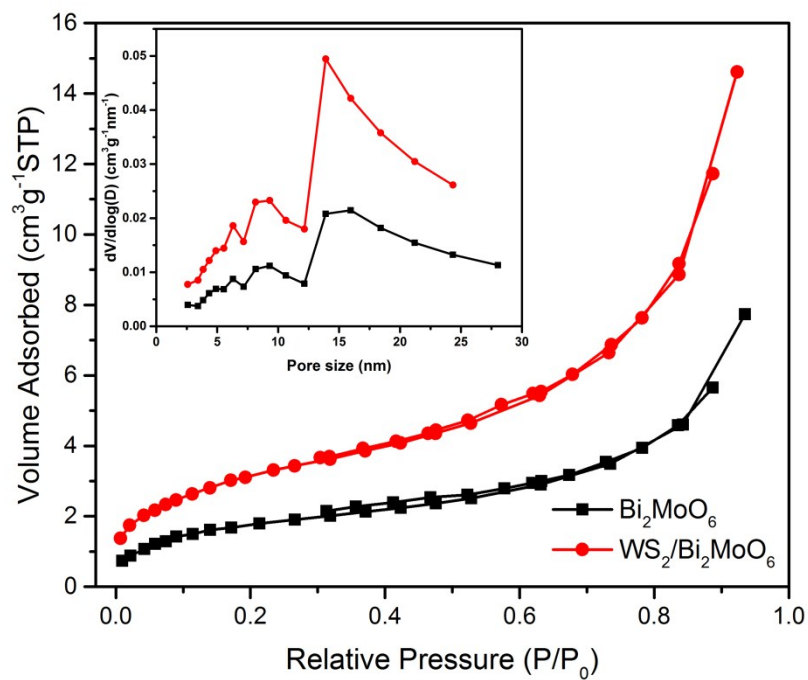

**Fig. S7**  $\text{N}_2$  adsorption-desorption isotherms of  $\text{Bi}_2\text{MoO}_6$  and the hierarchical  $\text{WS}_2/\text{Bi}_2\text{MoO}_6$  composite (5 wt% of  $\text{WS}_2$ ); the inset is the corresponding pore size distributions.



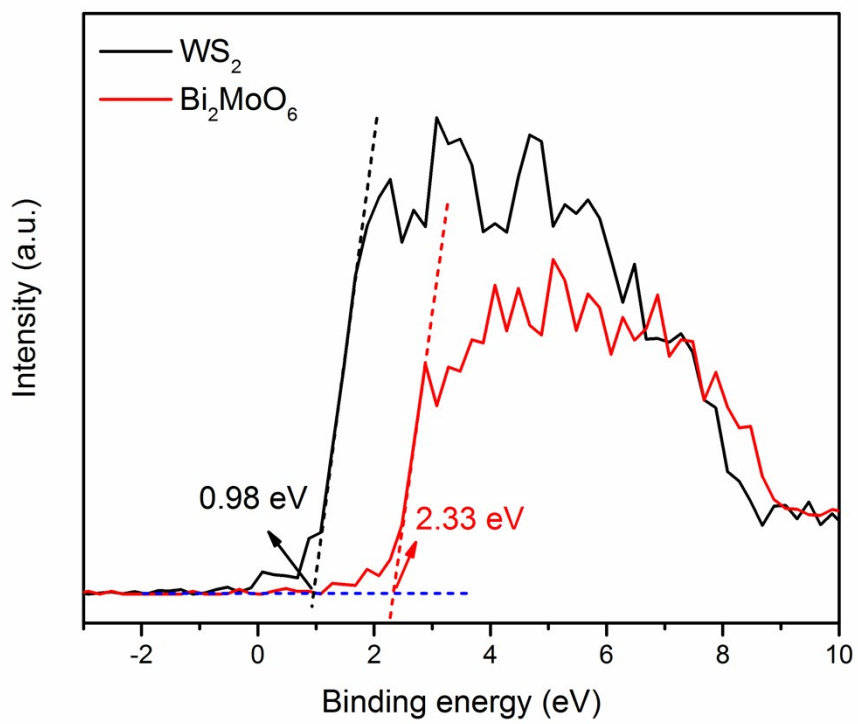

**Fig. S8** XPS valence band (VB) spectra of WS<sub>2</sub> and Bi<sub>2</sub>MoO<sub>6</sub>.

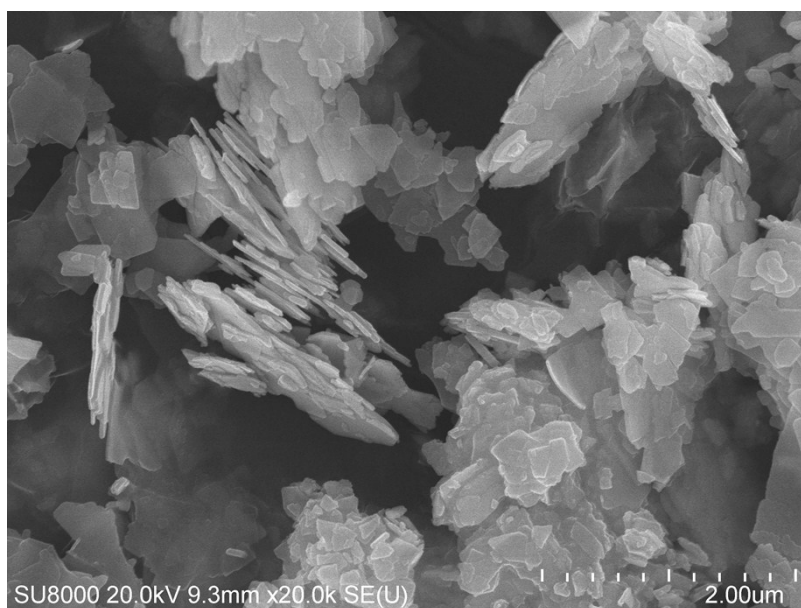

**Fig. S9** The SEM micrograph of the hierarchical  $\text{WS}_2/\text{Bi}_2\text{MoO}_6$  composite (5 wt% of  $\text{WS}_2$ ) after the recycle experiments.

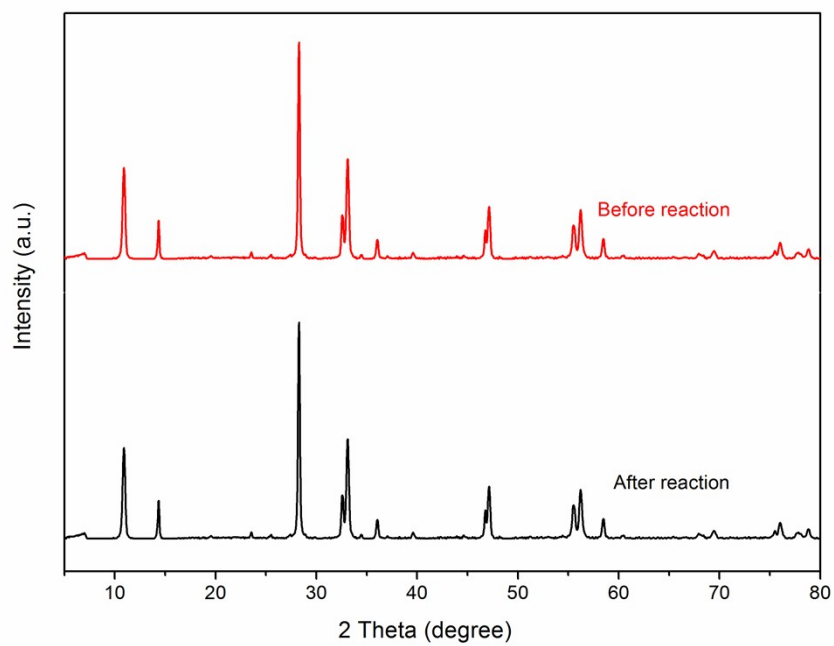

**Fig. S10** The XRD patterns of the hierarchical  $\text{WS}_2/\text{Bi}_2\text{MoO}_6$  composite (5 wt% of  $\text{WS}_2$ ) before and after photocatalytic reaction.

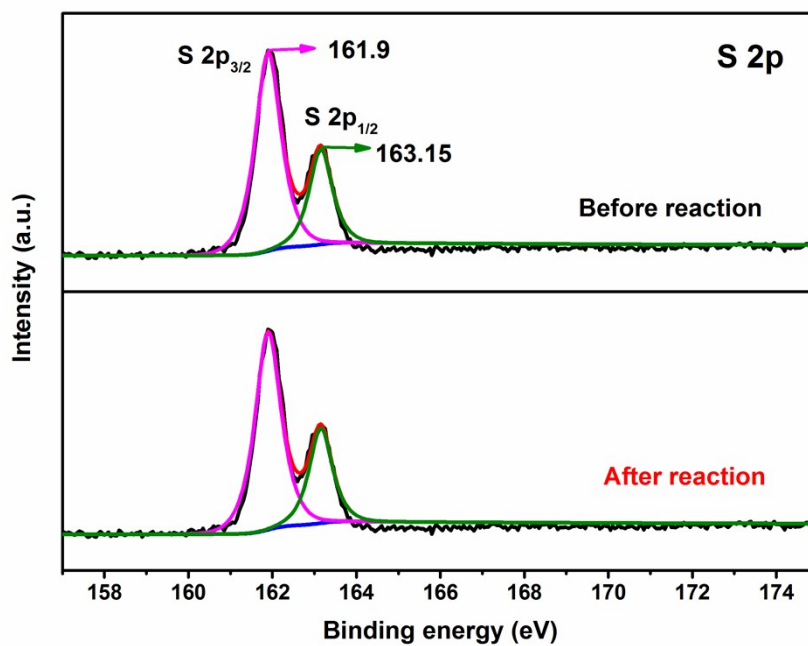

**Fig. S11** The high-resolution XPS spectra of S 2p for the hierarchical WS<sub>2</sub>/Bi<sub>2</sub>MoO<sub>6</sub> composite (5 wt% of WS<sub>2</sub>) before and after photocatalytic reaction.

**Table S1** The first-order rate constants for RhB degradation with as-synthesized samples under visible light irradiation.

| Photocatalysts | Rate constant (min <sup>-1</sup> ) | Correlation coefficient |
|----------------|------------------------------------|-------------------------|
|----------------|------------------------------------|-------------------------|

|                                                                             | <sup>1)</sup> | (R <sup>2</sup> ) |
|-----------------------------------------------------------------------------|---------------|-------------------|
| Blank                                                                       | 0.0005        | 0.9202            |
| WS <sub>2</sub>                                                             | 0.0036        | 0.9939            |
| Bi <sub>2</sub> MoO <sub>6</sub>                                            | 0.0081        | 0.9994            |
| 1 wt% WS <sub>2</sub> /Bi <sub>2</sub> MoO <sub>6</sub>                     | 0.0103        | 0.9978            |
| 3 wt% WS <sub>2</sub> /Bi <sub>2</sub> MoO <sub>6</sub>                     | 0.0157        | 0.9845            |
| 5 wt% WS <sub>2</sub> /Bi <sub>2</sub> MoO <sub>6</sub>                     | 0.0367        | 0.9745            |
| 7 wt% WS <sub>2</sub> /Bi <sub>2</sub> MoO <sub>6</sub>                     | 0.0087        | 0.9975            |
| Physical mixture of<br>Bi <sub>2</sub> MoO <sub>6</sub> and WS <sub>2</sub> | 0.0098        | 0.9991            |
